# Supplementary material for: Machine Learning Model to Predict Hypotension After Starting Continuous Renal Replacement Therapy
Source: Research Square preprint supplement (doi:10.21203/rs.3.rs-125446/v1), 2020-12-11

Figure S1. Nonlinear relationship between the odds ratio (OR) of intensive care unit (ICU) mortality and the reduction in mean arterial pressure (MAP) within 6 hours (A) and 1 hour (B). Gray area indicates 95% confidence intervals.

(A)


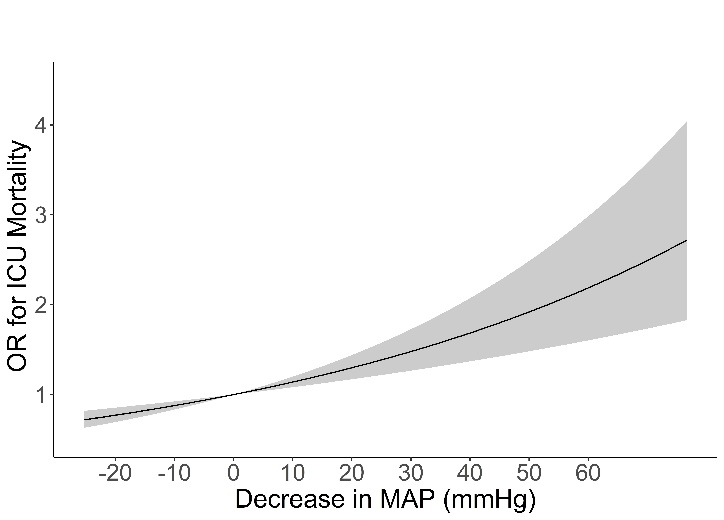


(B)


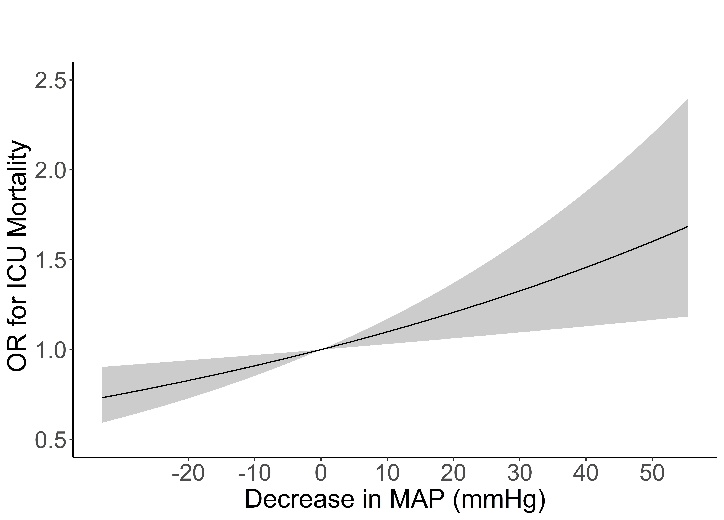


Figure S2. Feature rankings for the deep neural network model in predicting a reduction in mean arterial pressure ≥20 mmHg (A, C) and ≥30 mmHg (B, D) within 6 hours (A, B) and 1 hour (C, D). SBP, systolic blood pressure; MAP, mean arterial pressure; DBP, diastolic blood pressure; BUN, blood urea nitrogen; I/O, input and output; PaO2, arterial partial pressure of oxygen; FiO2, fraction of inspired oxygen.

(A)


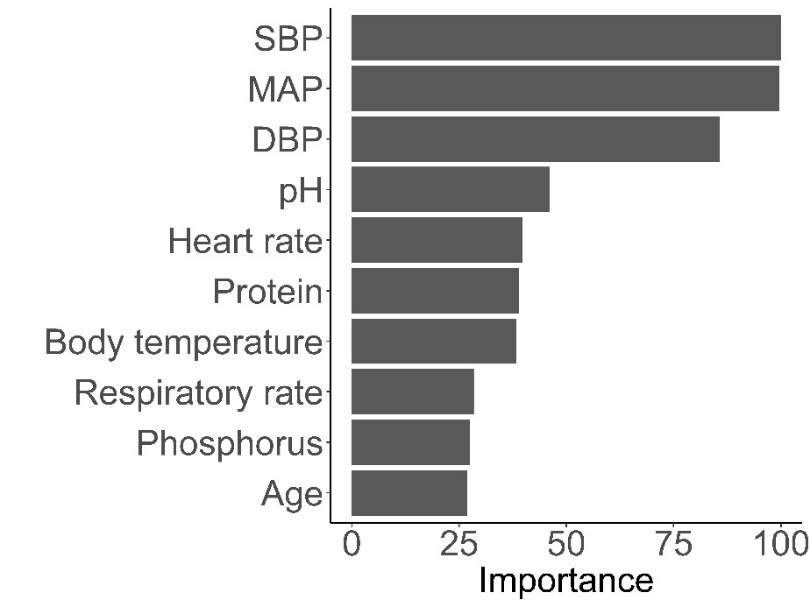


(B)


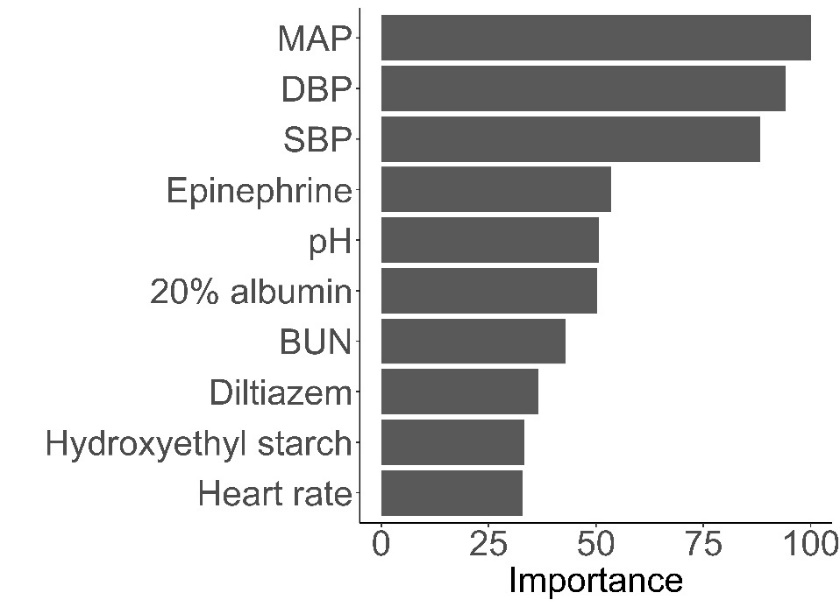


(C)


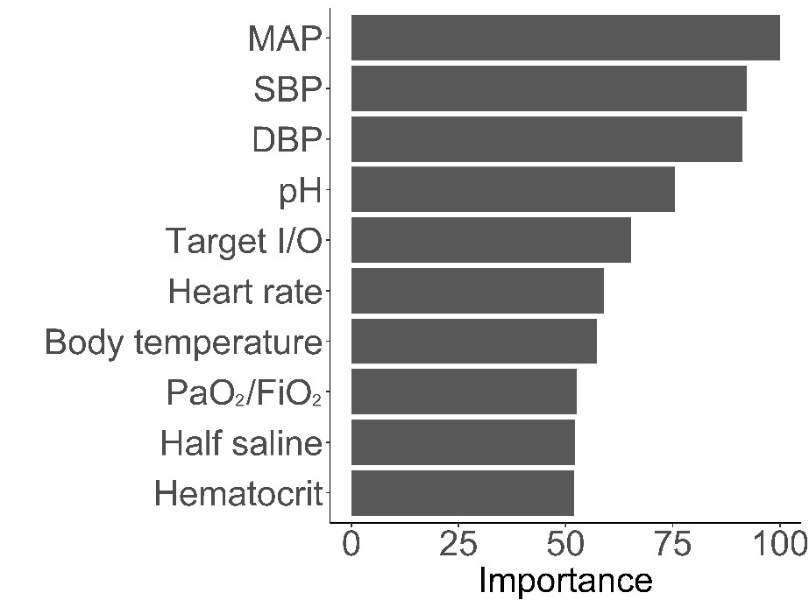


(D)


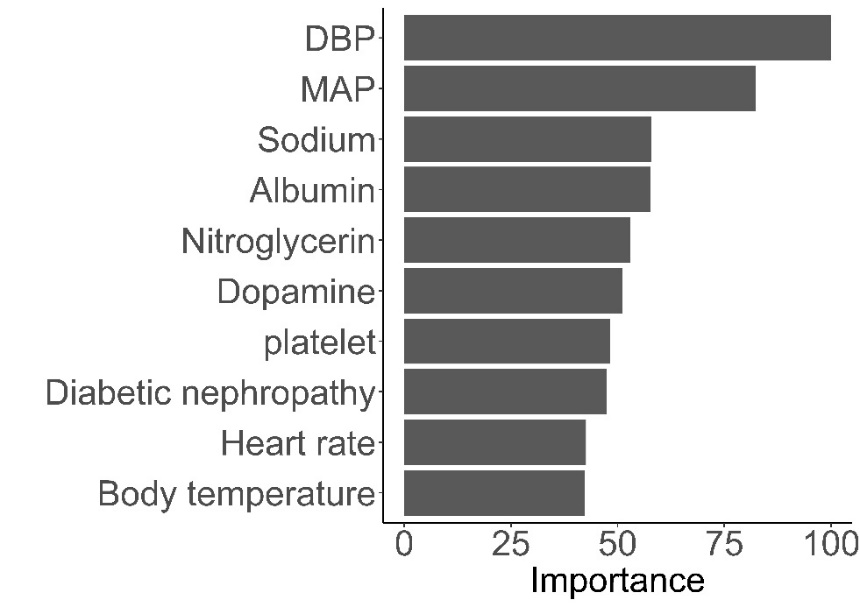

Supplement: Supplementary file 1 [file 4e67cc12d775867fed1c1b28.docx]
